## Atrial strain performance in patients with paroxysmal atrial fibrillation undergoing successful radio-frequency catheter ablation

Katbeh A.; De Potter T.; Geelen P.; Nagumo S.; Balogh Z.; Albano M.; Van Camp G.; Penicka M.

Olv Hospital Aalst, Aalst, Belgium

**Funding Acknowledgements:** Type of funding sources: Public Institution(s). Main funding source(s): International PhD Program in Cardiovascular Pathophysiology and Therapeutics CardioPaTh

**Background:** Radio-frequency catheter ablation (CA) is associated with changes of left atrial (LA) structure and function. However, there is limited knowledge regarding the long-term impact of successful CA on atrial morphology and mechanics.

**Purpose:** To compare the time course of LA and right atrial (RA) performance in patients with paroxysmal atrial fibrillation (AF) undergoing the first CA.

**Methods:** This prospective study included 89 consecutive patients (age:  $62 \pm 21$  years; 66% male) with a history of symptomatic AF who underwent successful CA. All patients maintained SR during follow-up. A comprehensive echocardiographic examination was performed 1-day before and 1-day, 3-month and 12-month after CA. The reservoir and contractile strain for both LA and RA (LAS, RAS), and left intra-atrial mechanical dispersion (LAMD) were assessed using 2D speckle tracking echocardiography in all three apical views (only 4CH view for RAS and LAMD).

**Results:** At baseline, all patients with paroxysmal AF showed a significant reduction of reservoir and contractile LAS and RAS compared with controls (all  $p < 0.01$ ). CA was associated with a significant decrease in reservoir and contractile LAS while no significant difference was observed for RAS. At 3-month follow-up, the LAS showed full recovery, whereas the RAS did not show any significant change from 1-day post CA values. At 12-month follow-up, both reservoir and contractile LAS showed further improvement compared to baseline and 3-month values. LAMD derived from the LA strain curve followed a similar trend. Although the RA motion was not affected in the early phase, both reservoir and contractile RAS showed a significant increase between 3-month and 12-month follow-up.

**Conclusion:** Although the radio-frequency CA affected negatively LA performance in the acute phase, it has a long-term positive impact on both left and right atrial function.

**Figure:** Time course of reservoir and contractile LAS and RAS at Baseline, 1-day, 3-month and 12-month follow-up.

Abstract Figure.

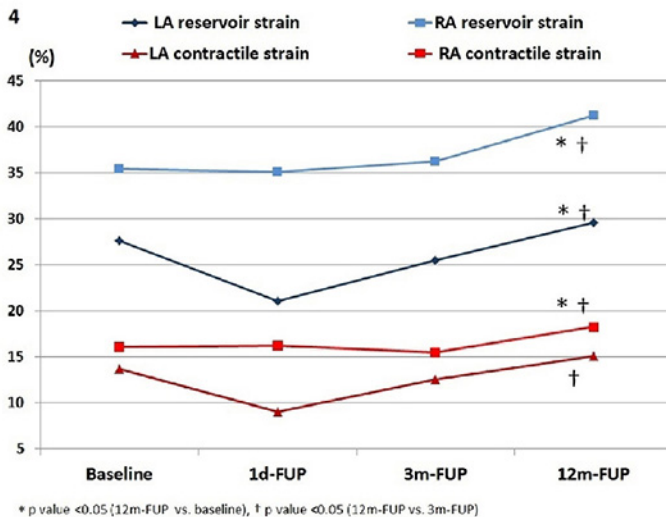

Source: http://academic.oup.com/ehjcimaging/article-pdf/22/Supplement_1/jeaa356.174/36214313/jeaa356.174.pdf
